# Supplementary material for: Boosting nitrogen reduction on single Mo atom by tuning its coordination environment
Source: Royal Society of Chemistry journal article supplement (doi:10.1039/d1se01390d), 2021-01-01
Supplement: d1se01390d1.pdf [file d1se01390d1.pdf]

## Supporting Information

### Boosting Nitrogen Reduction on Single Mo Atom by Tuning its Coordination

#### Environment

Lingyi Kong,<sup>a</sup> Siyao Qiu,<sup>b</sup> Qinghai Cai,<sup>a,d</sup> Jingxiang Zhao,<sup>a,\*</sup> Chenghua Sun<sup>c,\*</sup>

<sup>a</sup> *College of Chemistry and Chemical Engineering, and Key Laboratory of Photonic and Electronic Bandgap Materials, Ministry of Education, Harbin Normal University, Harbin, 150025, China*

<sup>b</sup> *School of Chemical Engineering and Energy Technology, Dongguan University of Technology, Dongguan 523808, China*

<sup>c</sup> *Department of Chemistry and Biotechnology, and Centre for Translational Atomaterials, Swinburne University of Technology, Hawthorn, Victoria 3122, Australia*

<sup>d</sup> *Heilongjiang Province Collaborative Innovation Center of Cold Region Ecological Safety, Harbin 150025, China*

<sup>\*</sup> *To whom correspondence should be addressed. Email: chenghuasun@swin.edu.au*

*(C. Sun), and xjz\_hmily@163.com or zhaojingxiang@hrbnu.edu.cn (J. Zhao)*



### Theoretical faradaic efficiency

Hydrogen evolution reaction (HER) is regarded as the major competing reaction to NRR. If we assume: (1) the mass and electron transfer are not the rate determining factors for both HER and NRR, (2) only HER and NRR are competing reactions, the Faradaic efficiency of NRR ( $f_{NRR}$ ) can be estimated according to Boltzmann

distribution: 
$$f_{NRR} = \frac{1}{1 + e^{-\frac{\Delta G}{RT}}} \times 100\%$$
, where  $\Delta G$  is Gibbs free energy difference between HER and NRR limiting-potential step,  $k_B$  is the Boltzmann constant, and T is the room temperature.

**Table S1.** The computed formation energies<sup>1</sup> ( $E_{\text{form}}$ , eV) of various substrates without single Mo atom.

| substrates       | $E_{\text{form}}$ |
|------------------|-------------------|
| CO <sub>3</sub>  | -5.98             |
| BN <sub>3</sub>  | -2.86             |
| B <sub>3</sub> N | -1.02             |
| B <sub>3</sub> O | -1.93             |
| O <sub>4</sub>   | -9.35             |
| O <sub>3</sub> S | -7.16             |

<sup>1</sup> The formation energy of these doped graphene-based substrates can be determined by:  $E_{\text{form}} = E_{\text{substrate}} - E_{\text{di-gra}} - n\mu_{\text{dopant}} + m\mu_{\text{C}}$ , where  $E_{\text{substrate}}$  and  $E_{\text{di-gra}}$  represent the total electronic energies of various substrates without Mo anchoring and defective graphene with divacancy, respectively.  $\mu_{\text{dopant}}$  and  $\mu_{\text{C}}$  are the chemical potential of dopants and C atoms, respectively, which can be derived from their most stable materials.  $n$  and  $m$  are the numbers of the introduced dopants and the removed C atoms, respectively.

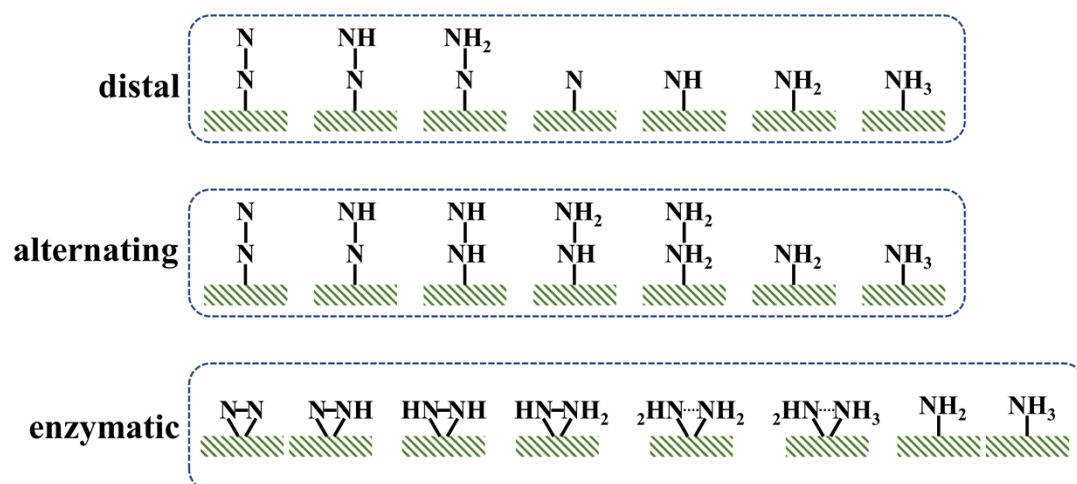

**Fig. S1.** Schematic illustrations of the NRR mechanisms including distal, alternating and enzymatic pathways.

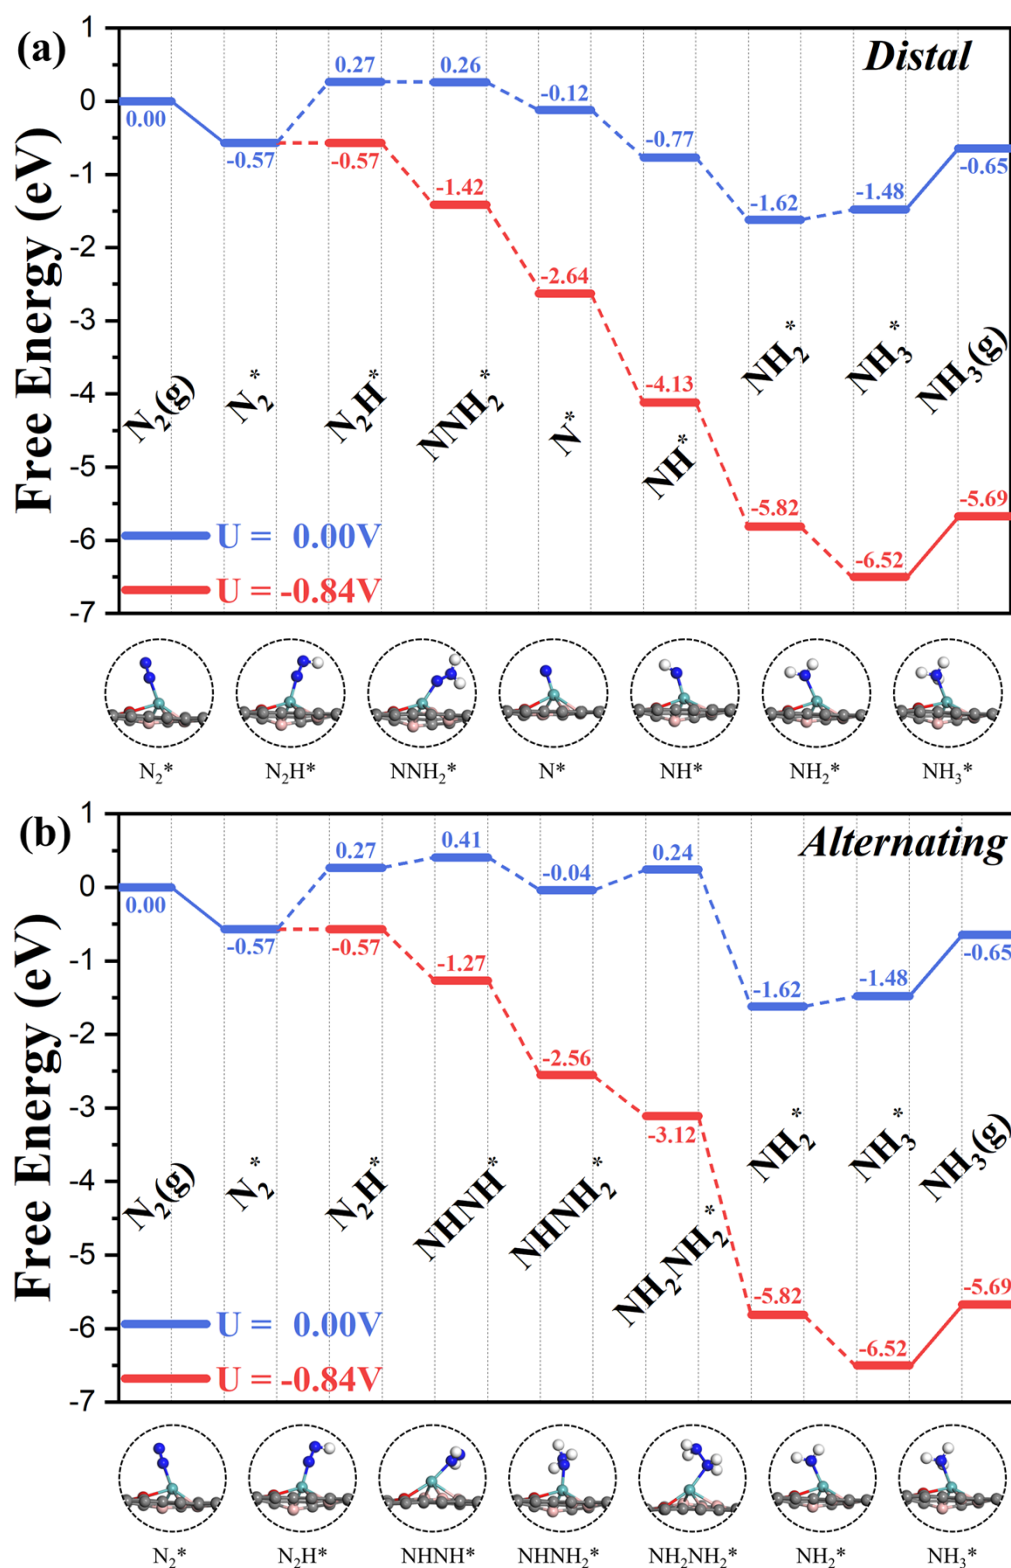

**Fig. S2.** Calculated free energy diagrams for  $N_2$  reduction on  $MoB_3O$  catalyst along the (a) distal, and (b) alternating pathways, with the corresponding atomic structures of reaction intermediates.

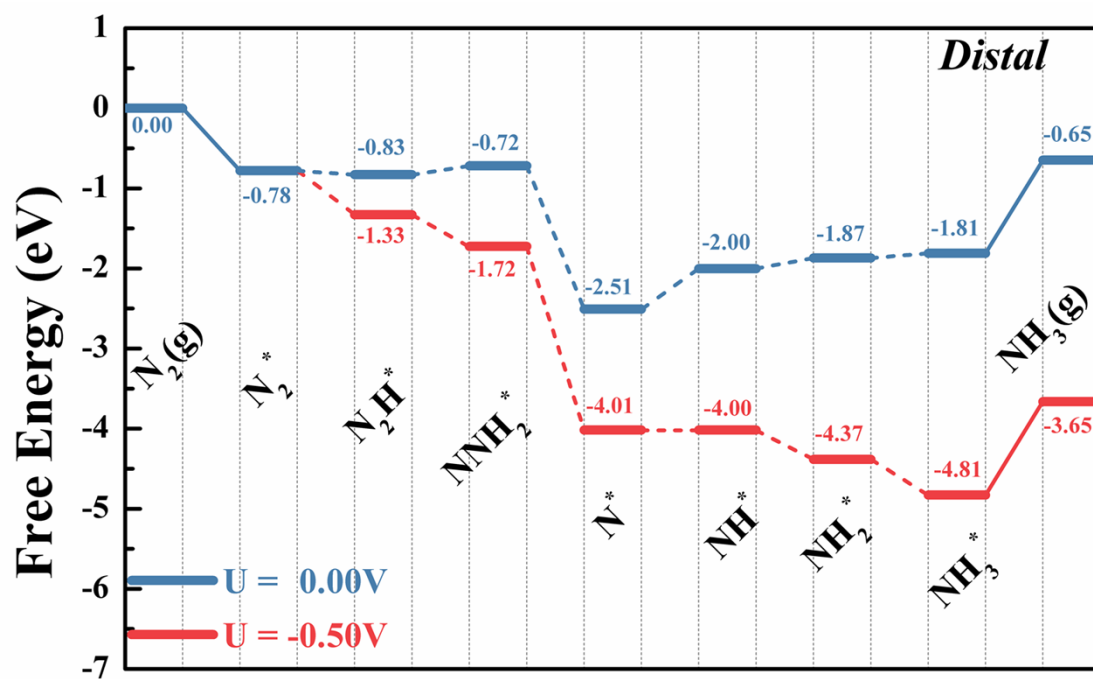

Fig. S3. The most energetically favorable free energy profile for NRR on the experimentally available MoO<sub>3</sub>S material.

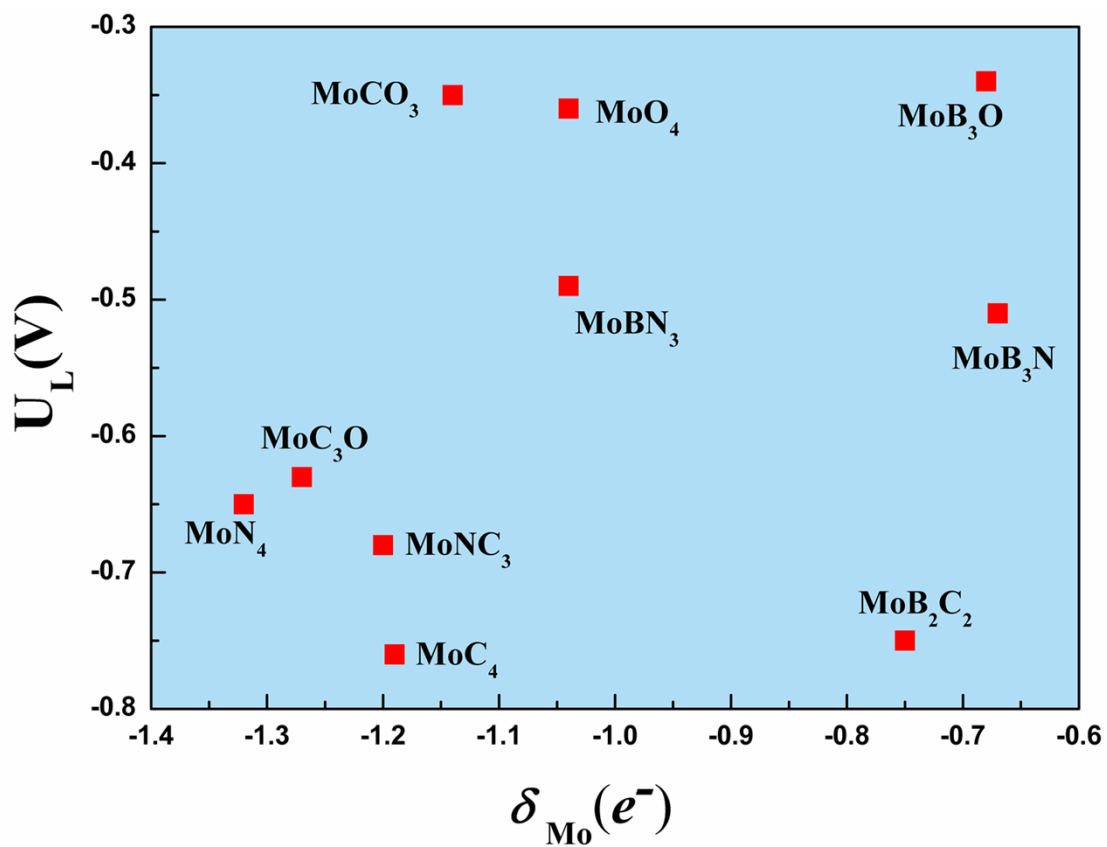

**Fig. S4.** The variation of  $U_L$  for NRR on Mo-based SACs with the charge states of Mo active site ( $\delta_{Mo}$ ).

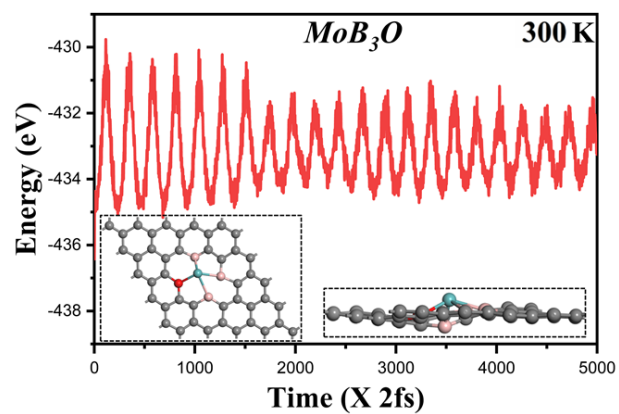

(a)

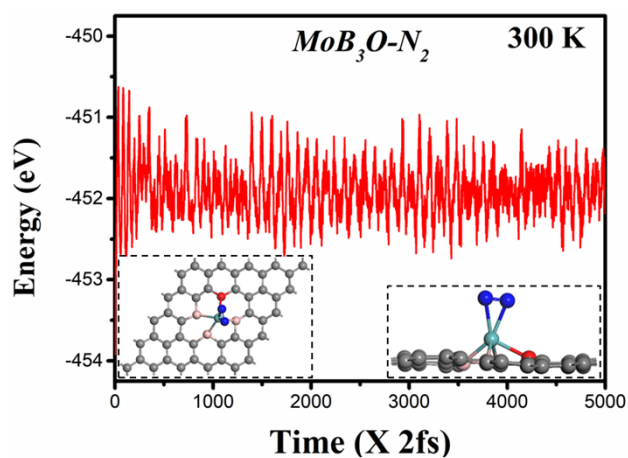

(b)

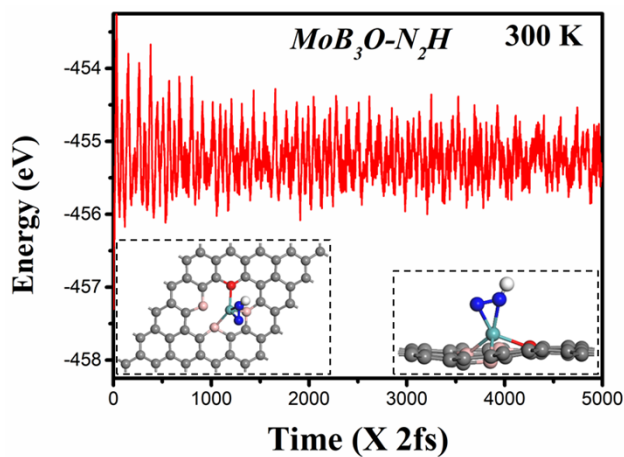

(c)

**Fig. S5.** Variations of energy against the time for AIMD simulations for (a)  $\text{MoB}_3\text{O}$ , (b)  $^*\text{N}_2$ , and (c)  $^*\text{N}_2\text{H}$  intermediates on  $\text{MoB}_3\text{O}$  catalyst, which is run under 300 K for 10 ps with a time step of 2 fs. Schematic diagrams of corresponding atomic configurations after dynamics simulations (top and side views) are also given.
